# Supplementary material for: Fcmr regulates mononuclear phagocyte control of anti-tumor immunity
Source: PubMed Central journal article supplement (PMC6581943; doi:10.1038/s41467-019-10619-w), 2019-06-18
Supplement: 41467_2019_10619_MOESM1_ESM.pdf [file 41467_2019_10619_MOESM1_ESM.pdf]

**Fc $\mu$ r regulates mononuclear phagocyte control of anti-tumor immunity**

Kubli *et al.*

**Supplementary Information**

## Supplementary Figure 1

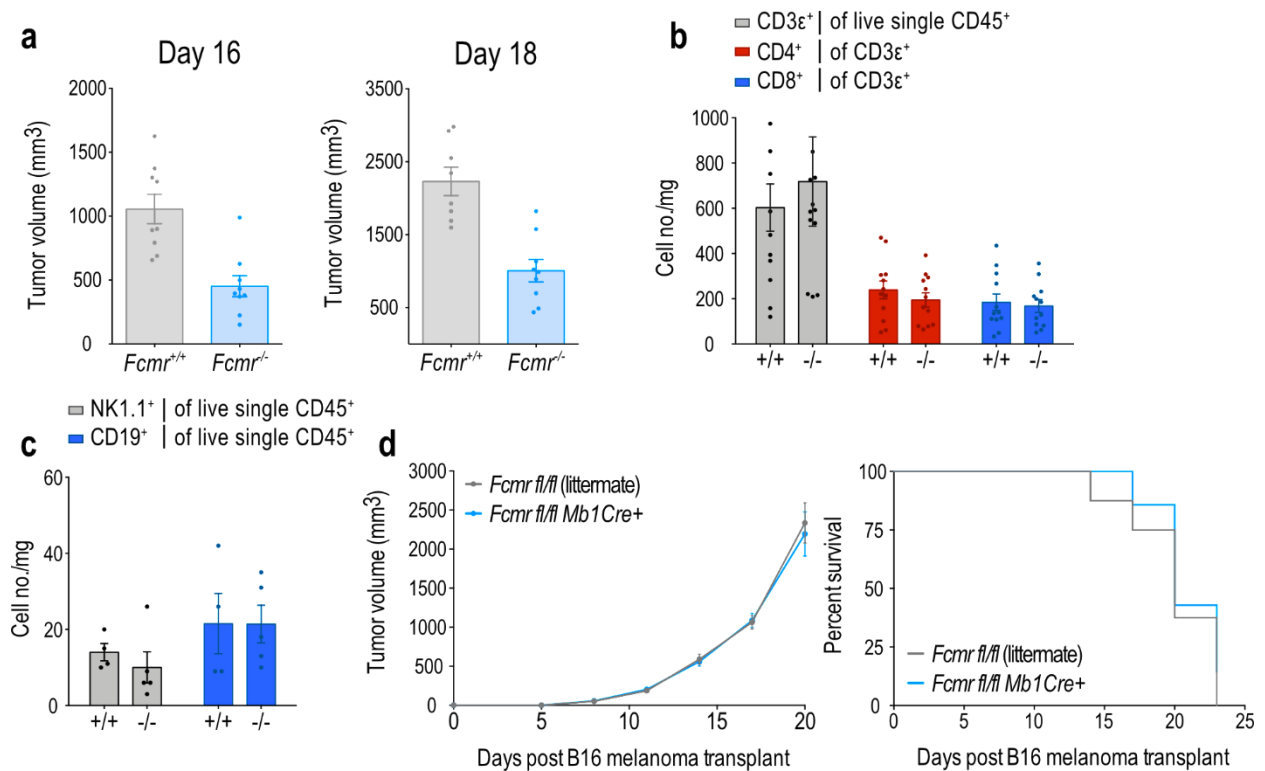

### Supplementary Figure 1. *Fcμr* inhibits myeloid cell-dependent anti-tumor immunity

**a** Quantification of tumor volumes for *Fcμr*<sup>+/+</sup> and *Fcμr*<sup>-/-</sup> mice at 16 days (left) and 18 days (right) after ventral-lateral intradermal transplant of B16F0 cells ( $2 \times 10^5$ ) superior to the inguinal lymph node (LN). Data points represent individual mice ( $n=9$  *Fcμr*<sup>+/+</sup> and 8 *Fcμr*<sup>-/-</sup> mice).

**b, c** Quantification of tumor-infiltrating cells in B16F0 tumors harvested from the *Fcμr*<sup>+/+</sup> and *Fcμr*<sup>-/-</sup> mice in **a**. Cell densities of **b** the total T cell population (CD3ε<sup>+</sup>) and CD4<sup>+</sup> and CD8<sup>+</sup> T cell subpopulations, and **c** the B and NK cell populations, in harvested tumors are shown. All cell density measurements were normalized to tumor mass. Each data point represents an individual mouse.

**d** Time course of (left) B16F0 tumor growth and (right) mouse survival for *Fcμr*<sup>fl/fl</sup>; *Mb1Cre*<sup>+</sup> and *Fcμr*<sup>fl/fl</sup> littermate mice ( $n=8$  *Fcμr*<sup>fl/fl</sup> and 7 *Fcμr*<sup>fl/fl</sup>; *Mb1Cre*<sup>+</sup> mice) that received transplant of B16F0 cells as in **a**.

Data are represented as mean  $\pm$  SEM (ANOVA, *t* test; \* $p < 0.05$ ; \*\* $p < 0.01$ ; \*\*\* $p < 0.001$ )

## Supplementary Figure 2

**a**

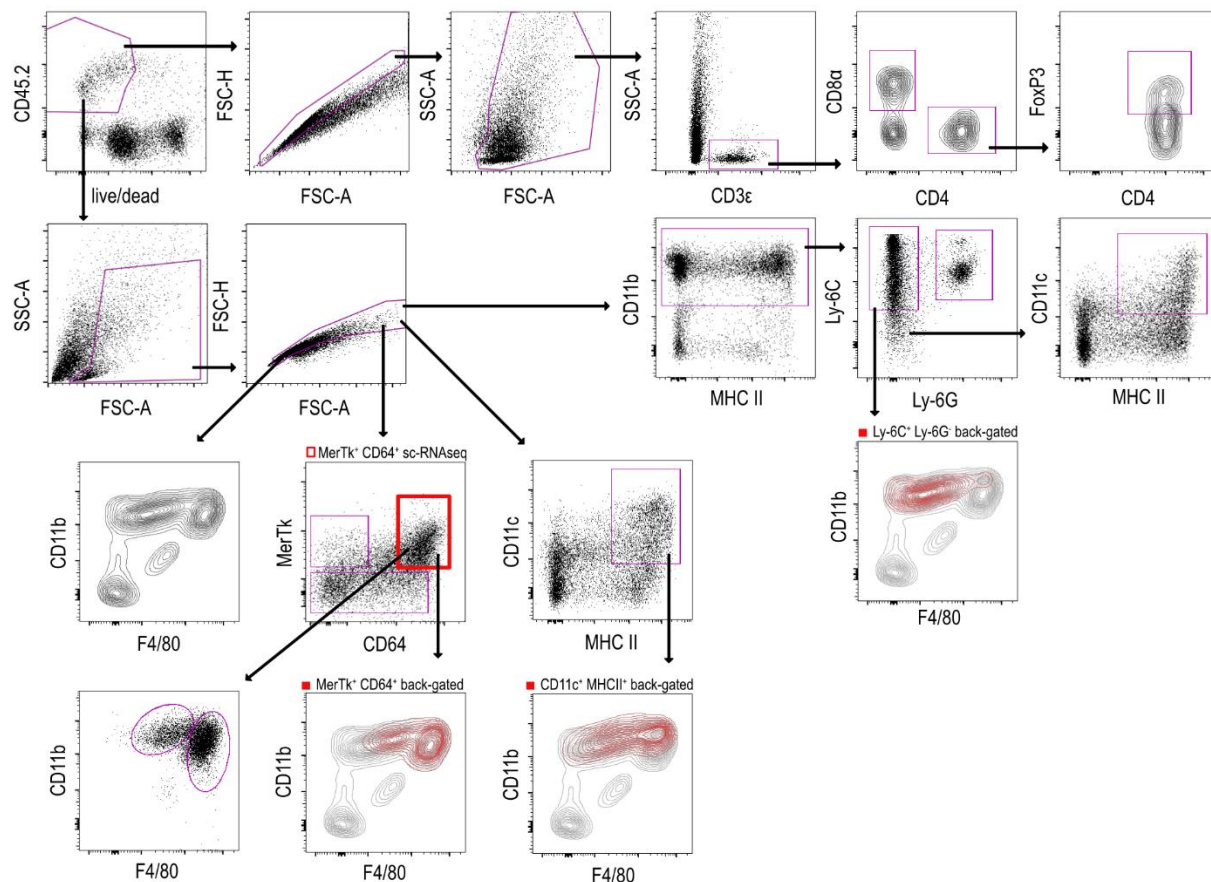

**b**

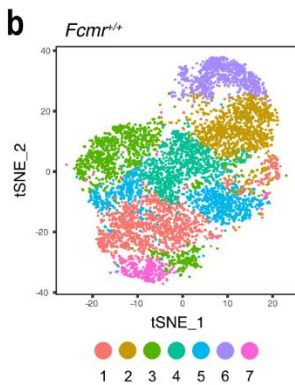

**c**

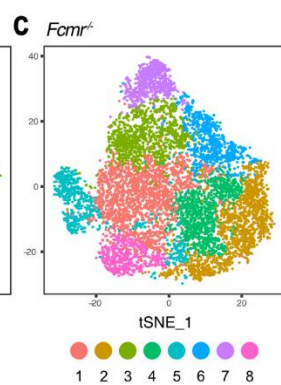

**d**

| <i>Fcgr<sup>+/+</sup></i> only cluster | No. of <i>Fcgr<sup>-/-</sup></i> cells |
|----------------------------------------|----------------------------------------|
| 1                                      | 1273                                   |
| 2                                      | 916                                    |
| 3                                      | 765                                    |
| 4                                      | 691                                    |
| 5                                      | 1662                                   |
| 6                                      | 756                                    |
| 7                                      | 639                                    |
| unassigned                             | 1297                                   |

**e**

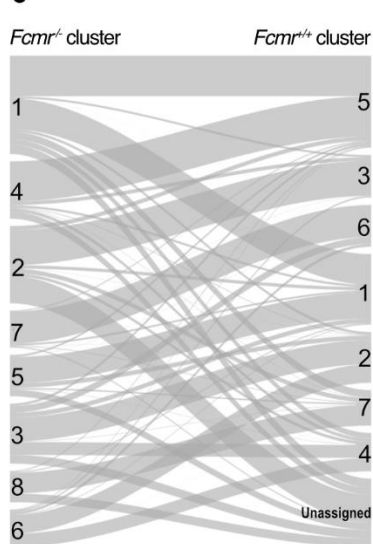

**f**

| Transcription Factor | ***logFC |
|----------------------|----------|
| Irf7                 | 0.633    |
| Stat1                | 0.574    |
| Basp1                | 0.336    |
| Mxi1                 | 0.285    |
| Polr2l               | 0.282    |
| Hif1a                | 0.281    |
| Ugp2                 | 0.257    |
| Klf2                 | -0.256   |
| Fosb                 | -0.272   |
| Egr1                 | -0.427   |

## Supplementary Figure 2. Fcμr deficiency alters the functional heterogeneity of TMPs

**a** Representative flow cytometry plots illustrating the gating schemes used to quantify tumor-infiltrating immune cells in the B16F0 tumors from the *Fcμr<sup>+/+</sup>* and *Fcμr<sup>-/-</sup>* mice in Supplemental Figure 1a.

**b, c** t-SNE representation of cell clusters from FACS-sorted TMPs isolated from the B16F0 tumors of the *Fcμr<sup>+/+</sup>* and *Fcμr<sup>-/-</sup>* mice in Figure S1A. *Fcμr<sup>+/+</sup>* cells **b** were clustered separately from *Fcμr<sup>-/-</sup>* cells **c**.

**d** Table illustrating the number of *Fcμr<sup>-/-</sup>* cells that could be “assigned” to each of the 7 identified *Fcμr<sup>+/+</sup>* cell clusters in **b**, and those *Fcμr<sup>-/-</sup>* cells that could not be assigned (unassigned).

**e** Sankey diagram showing the proportion of *Fcμr<sup>-/-</sup>* cells from each representative cluster in the analysis of *Fcμr<sup>-/-</sup>* cells in **c** that were “assigned” to each of the 7 identified *Fcμr<sup>+/+</sup>* cell clusters in **b**. Unassigned *Fcμr<sup>-/-</sup>* cells are also shown.

**f** Table illustrating the significantly differentially expressed transcription factors for unassigned *Fcμr<sup>-/-</sup>* cells and the associated log fold change (logFC) expression difference compared to all *Fcμr<sup>+/+</sup>* cells.

**Supplementary Table 1**

| Pathway                                                           | logFC | t    | B     |
|-------------------------------------------------------------------|-------|------|-------|
| Endosomal vacuolar pathway                                        | 0.37  | 23.1 | 249.2 |
| Antigen processing and presentation of endogenous peptide antigen | 0.28  | 23.1 | 249.9 |
| Antigen processing and presentation of endogenous antigen         | 0.23  | 20.8 | 202.6 |
| MHC protein complex                                               | 0.19  | 17.7 | 145.1 |
| MHC class I protein complex                                       | 0.14  | 12.6 | 70.2  |
| Type I interferon receptor binding                                | 0.20  | 32.8 | 494.0 |
| Type I interferon pathway                                         | 0.20  | 19.3 | 174.1 |
| Interferon- $\alpha$ and - $\beta$ signaling                      | 0.14  | 18.6 | 161.0 |
| Response to type I interferon                                     | 0.16  | 20.2 | 191.8 |
| Interferon- $\gamma$ production                                   | 0.12  | 15.3 | 107.8 |
| Interferon- $\gamma$ pathway                                      | 0.17  | 18.2 | 153.5 |
| Interferon- $\gamma$ signaling                                    | 0.10  | 15.1 | 104.8 |
| Negative regulation of IL-10 production                           | 0.19  | 26.9 | 338.4 |
| Positive regulation of cytokine production                        | 0.15  | 23.0 | 248.5 |
| Cytotoxic T lymphocyte pathway                                    | 0.22  | 28.5 | 377.6 |
| Positive regulation of T cell mediated cytotoxicity               | 0.15  | 18.5 | 159.8 |
| Positive regulation of T cell cytokine production                 | 0.14  | 18.1 | 152.6 |
| T cytotoxic pathway                                               | 0.15  | 18.2 | 153.8 |
| Regulation of T cell mediated cytotoxicity                        | 0.12  | 18.1 | 152.0 |
| Positive regulation of $\alpha\beta$ T cell proliferation         | 0.11  | 15.9 | 116.9 |

Pathways indicated are those found enriched in unassigned *Fcgr2*<sup>-/-</sup> tumor-associated mononuclear phagocytes (MPs) as compared to all *Fcgr2*<sup>+/+</sup> MPs. Values illustrated are the log2-fold-changes of the linearly modeled GSVA scores of the two groups being compared, along with the moderated t-statistic (t) and the B-statistic (the log-odds that a pathway is differentially expressed). Adjusted P-values (using the Benjamini-Hochberg procedure<sup>45</sup>) for all the pathways indicated are  $P \leq 1 \times 10^{-35}$ .

**Supplementary Table 2**

| <b>Pathway</b>                                                       | <b>logFC</b> | <b>t</b> | <b>B</b> |
|----------------------------------------------------------------------|--------------|----------|----------|
| Creation of C4 and C2 activators                                     | -0.15        | -9.8     | 39.4     |
| Gap junction trafficking                                             | -0.15        | -17.1    | 135.3    |
| Sterol catabolic process                                             | -0.12        | -14.4    | 94.8     |
| Regulation of amyloid precursor protein catabolic process            | -0.12        | -15.8    | 114.8    |
| Negative regulation of dendritic spine development                   | -0.11        | -14.0    | 89.3     |
| Regulation of cytokine secretion involved in immune response         | -0.10        | -12.6    | 71.5     |
| Positive regulation of insulin-like growth factor receptor signaling | -0.10        | -10.7    | 49.3     |
| S1P and S1P4 pathway                                                 | -0.08        | -11.6    | 59.2     |
| Vitamin D metabolic process                                          | -0.08        | -8.5     | 28.4     |
| Gamma aminobutyric acid signaling                                    | -0.08        | -10.9    | 51.5     |
| Positive regulation of cardiac muscle cell differentiation           | -0.08        | -10.4    | 46.3     |
| Positive regulation of response to oxidative stress                  | -0.07        | -11.9    | 62.8     |
| PLCE pathway                                                         | -0.07        | -9.8     | 39.8     |
| HDL mediated lipid transport                                         | -0.07        | -8.9     | 31.8     |
| Positive regulation of macrophage differentiation                    | -0.07        | -10.2    | 43.9     |
| Clathrin binding                                                     | -0.07        | -15.3    | 106.7    |
| Tryptophan metabolism                                                | -0.06        | -12.9    | 74.4     |
| Cellular modified amino acid catabolic process                       | -0.06        | -9.8     | 39.7     |
| Neutral lipid catabolic process                                      | -0.06        | -9.2     | 33.9     |
| Positive regulation of non-canonical Wnt signaling pathway           | -0.05        | -8.1     | 24.6     |

Pathways indicated are those found relatively downregulated in unassigned *Fcmm<sup>-/-</sup>* tumor-associated mononuclear phagocytes (MPs) as compared to all *Fcmm<sup>+/+</sup>* MPs. Values illustrated are the log<sub>2</sub>-fold-changes of the linearly modeled GSVA scores of the two groups being compared, along with the moderated t-statistic (t) and the B-statistic (the log-odds that a pathway is differentially expressed). Adjusted P-values (using the Benjamini-Hochberg procedure<sup>45</sup>) for all the pathways indicated are  $P \leq 1 \times 10^{-35}$ .

### Supplementary Figure 3

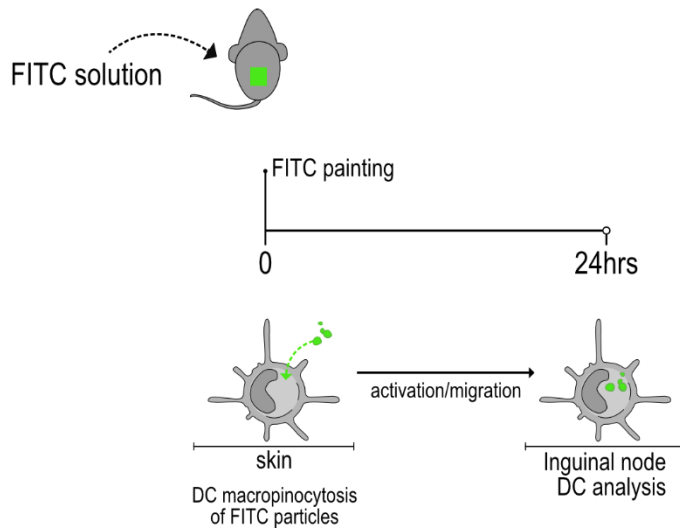

### Supplementary Figure 3. *Fcμr* inhibits DC phagocytosis, maturation, and migration

Schematic diagram of the experiment showing the ventral-lateral application of FITC solution (FITC-dibutylthallate) (top), the timeline of the experiment (middle), the uptake of FITC by skin DCs (bottom left), and DC trafficking to the inguinal lymph node followed by analysis (bottom right).

## Supplementary Figure 4

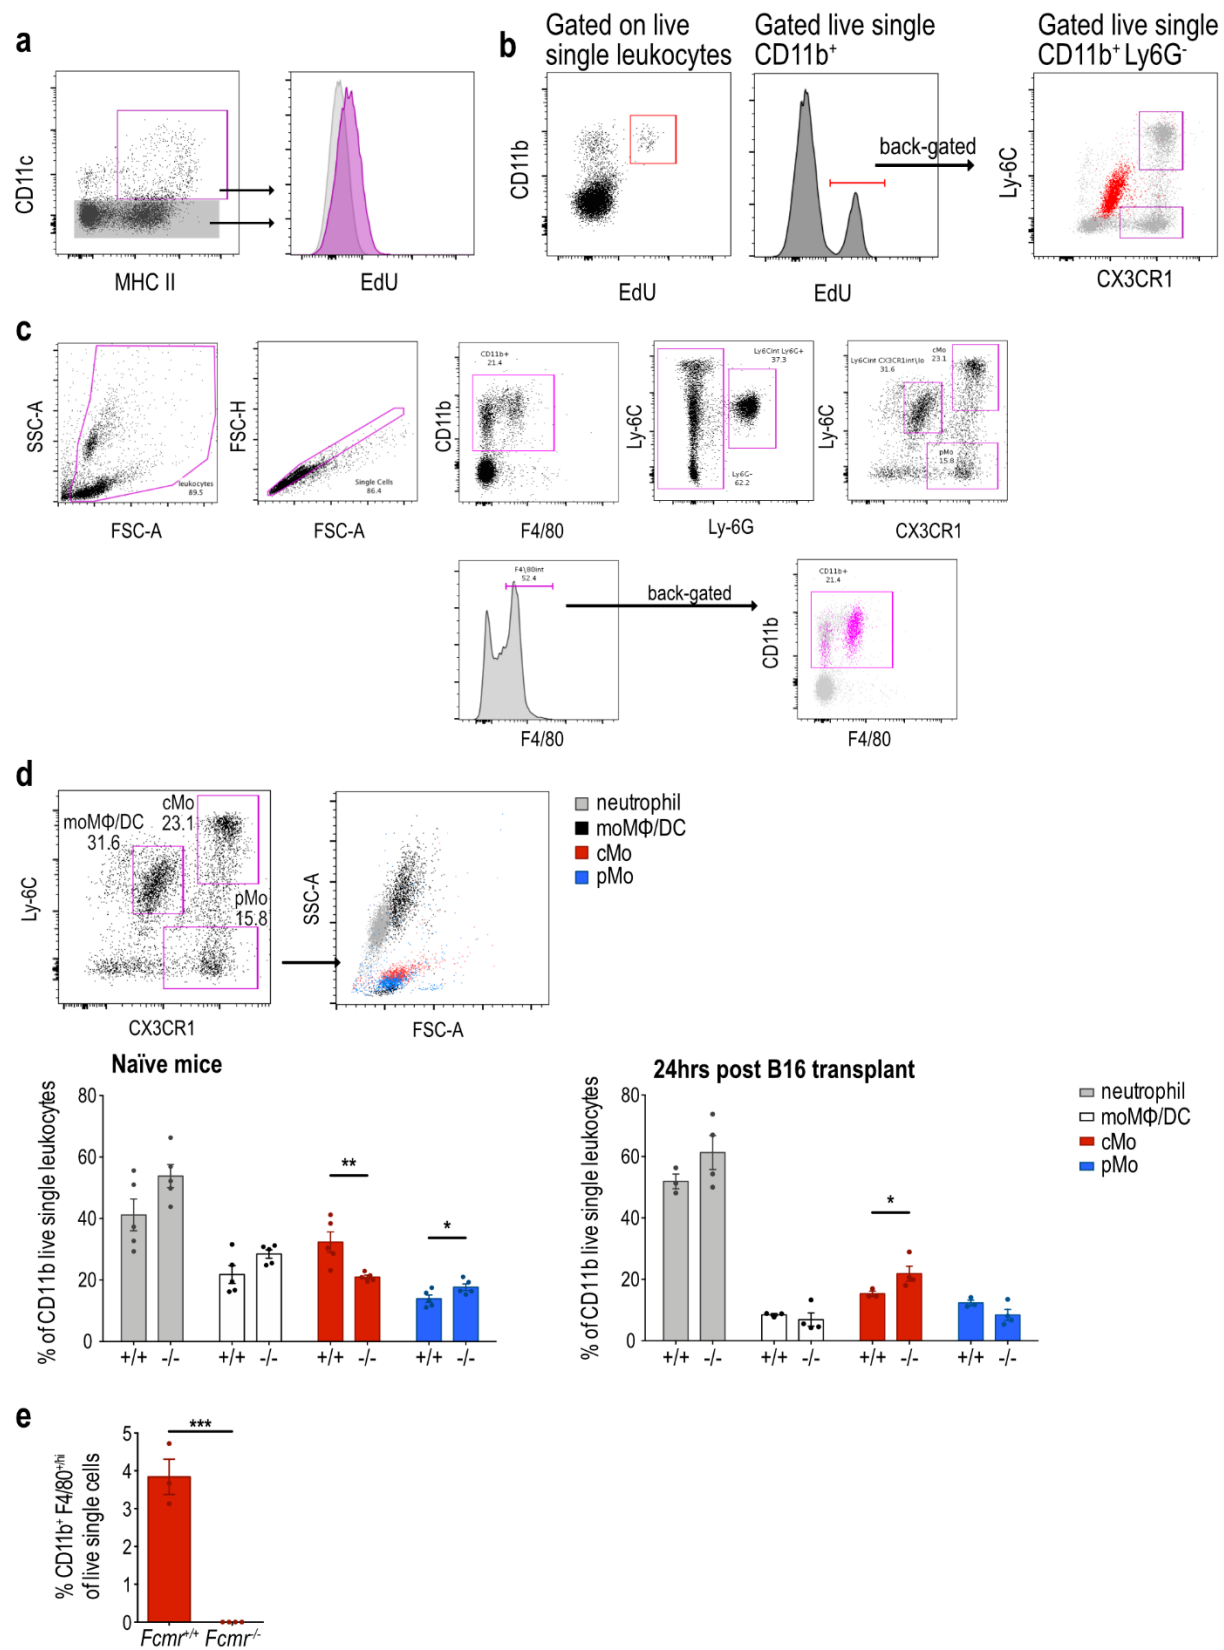



#### **Supplementary Figure 4. Fcμr inhibits MP uptake of cancer cell DNA**

**a** Left: Representative flow cytometry plot illustrating gating strategy identifying total inguinal LN DCs (CD11c<sup>+</sup> MHC II<sup>+</sup>) and lymphocytes (CD11c<sup>-</sup> MHC II<sup>+/−</sup>). Right: Representative histogram showing EdU-positive DCs (purple) and EdU-negative lymphocytes (grey).

**b** Left: Representative flow cytometry plot illustrating EdU-positive and -negative leukocyte populations in the spleens of *Fcμr<sup>+/+</sup>* mice (n=5) at 24 hrs after receiving ventral-lateral intradermal injection of EdU-labeled B16 melanoma cells (B16.EdU). Middle: Representative histogram of EdU-positive and -negative myeloid cells in the mice in the left panel. Right: Back-gating of the EdU<sup>+</sup> population (red) among the cells in the middle panel.

**c** Representative flow cytometry plot illustrating the gating strategy for the identification of the various myeloid cell populations in peripheral blood (PB).

**d** Top left: Representative flow cytometry plot illustrating three MP subpopulations in mouse PB. Top right: Back-gating to show forward and side-scatter properties of the cell subsets in the top left panel. Bottom: Quantification of the populations in the top left panel in naïve *Fcμr<sup>+/+</sup>* and *Fcμr<sup>-/-</sup>* mice (left), and in *Fcμr<sup>+/+</sup>* and *Fcμr<sup>-/-</sup>* mice at 24 hrs post-intradermal transplant of B16 cells (right). Data points represent individual mice.

**e** Quantification of CD11b<sup>hi</sup> F4/80<sup>hi</sup> MPs in PB of *Fcμr<sup>+/+</sup>* and *Fcμr<sup>-/-</sup>* mice at 24 hrs post-intradermal B16 cell transplant.

Data are represented as mean ± SEM (*t* test; \*p<0.05; \*\*p<0.01; \*\*\*p<0.001)

**Supplementary Figure 5**

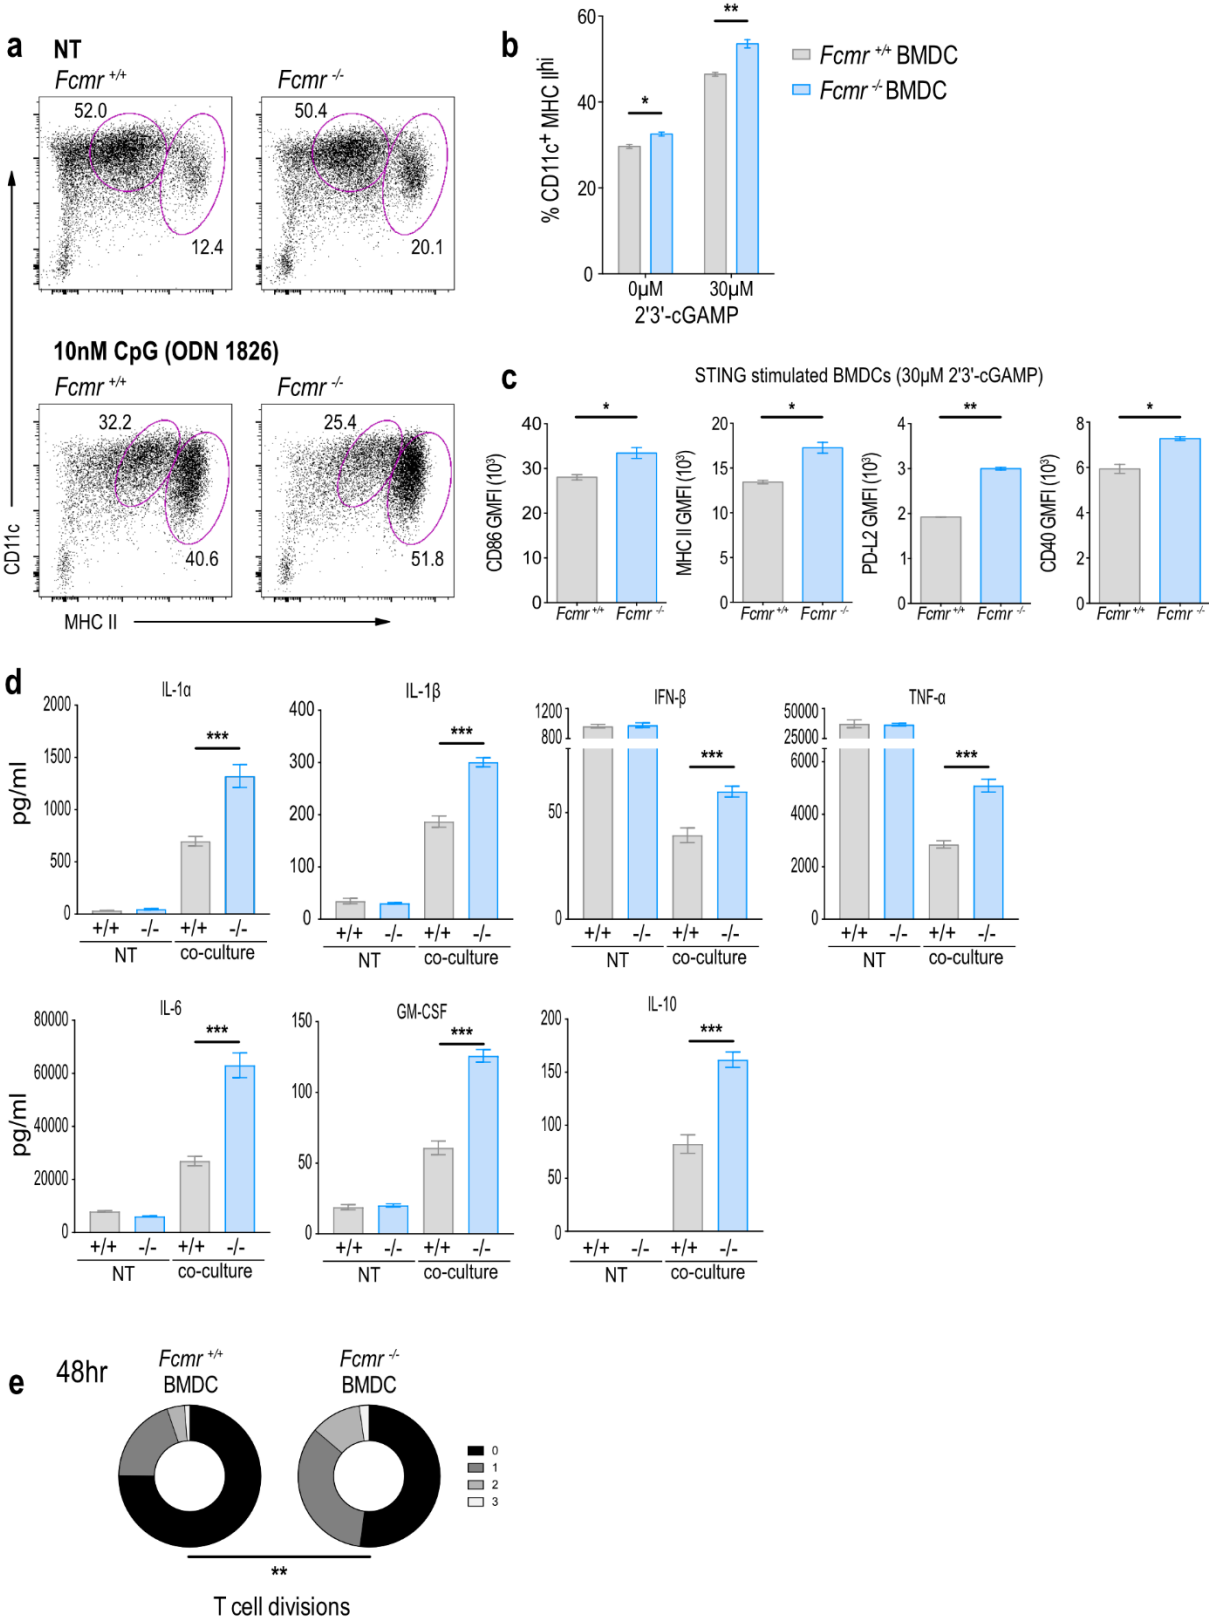

### Supplementary Figure 5. *Fcmlr* inhibits BMDC maturation

**a** Representative flow cytometry plots illustrating the gating strategy to identify immature (CD11c<sup>+</sup> MHC II<sup>int</sup>) and mature (CD11c<sup>+</sup> MHC II<sup>hi</sup>) BMDCs from *Fcmlr*<sup>+/+</sup> (left) and *Fcmlr*<sup>-/-</sup> (right) littermate mice (n=3/group) that were not treated (NT) (top), or stimulated with 10 nM CpG (bottom).

**b** Quantification of mature (CD11c<sup>+</sup> MHC II<sup>hi</sup>) *Fcmlr*<sup>+/+</sup> and *Fcmlr*<sup>-/-</sup> BMDCs following stimulation of the cyFcmrlc DNA-sensing pathway with the STING agonist 2'3'-cGAMP. Data represent 3 biological replicates.

**c** Quantification of GMFI values for the indicated co-stimulatory molecules expressed by the stimulated BMDCs in **b**.

**d** Quantification of the indicated cytokines produced by *Fcmlr*<sup>+/+</sup> and *Fcmlr*<sup>-/-</sup> BMDCs under NT or co-culture conditions. Data are pooled from three biological replicates.

**e** Quantification of T cell divisions at 48 hrs after co-culture with the *Fcmlr*<sup>+/+</sup> and *Fcmlr*<sup>-/-</sup> BMDCs. Data are from 3 technical replicates within each of 3 biological replicates.

Data are represented as mean ± SEM (ANOVA, *t* test; \*p<0.05; \*\*p<0.01; \*\*\*p<0.001)

**Supplementary Figure 6**

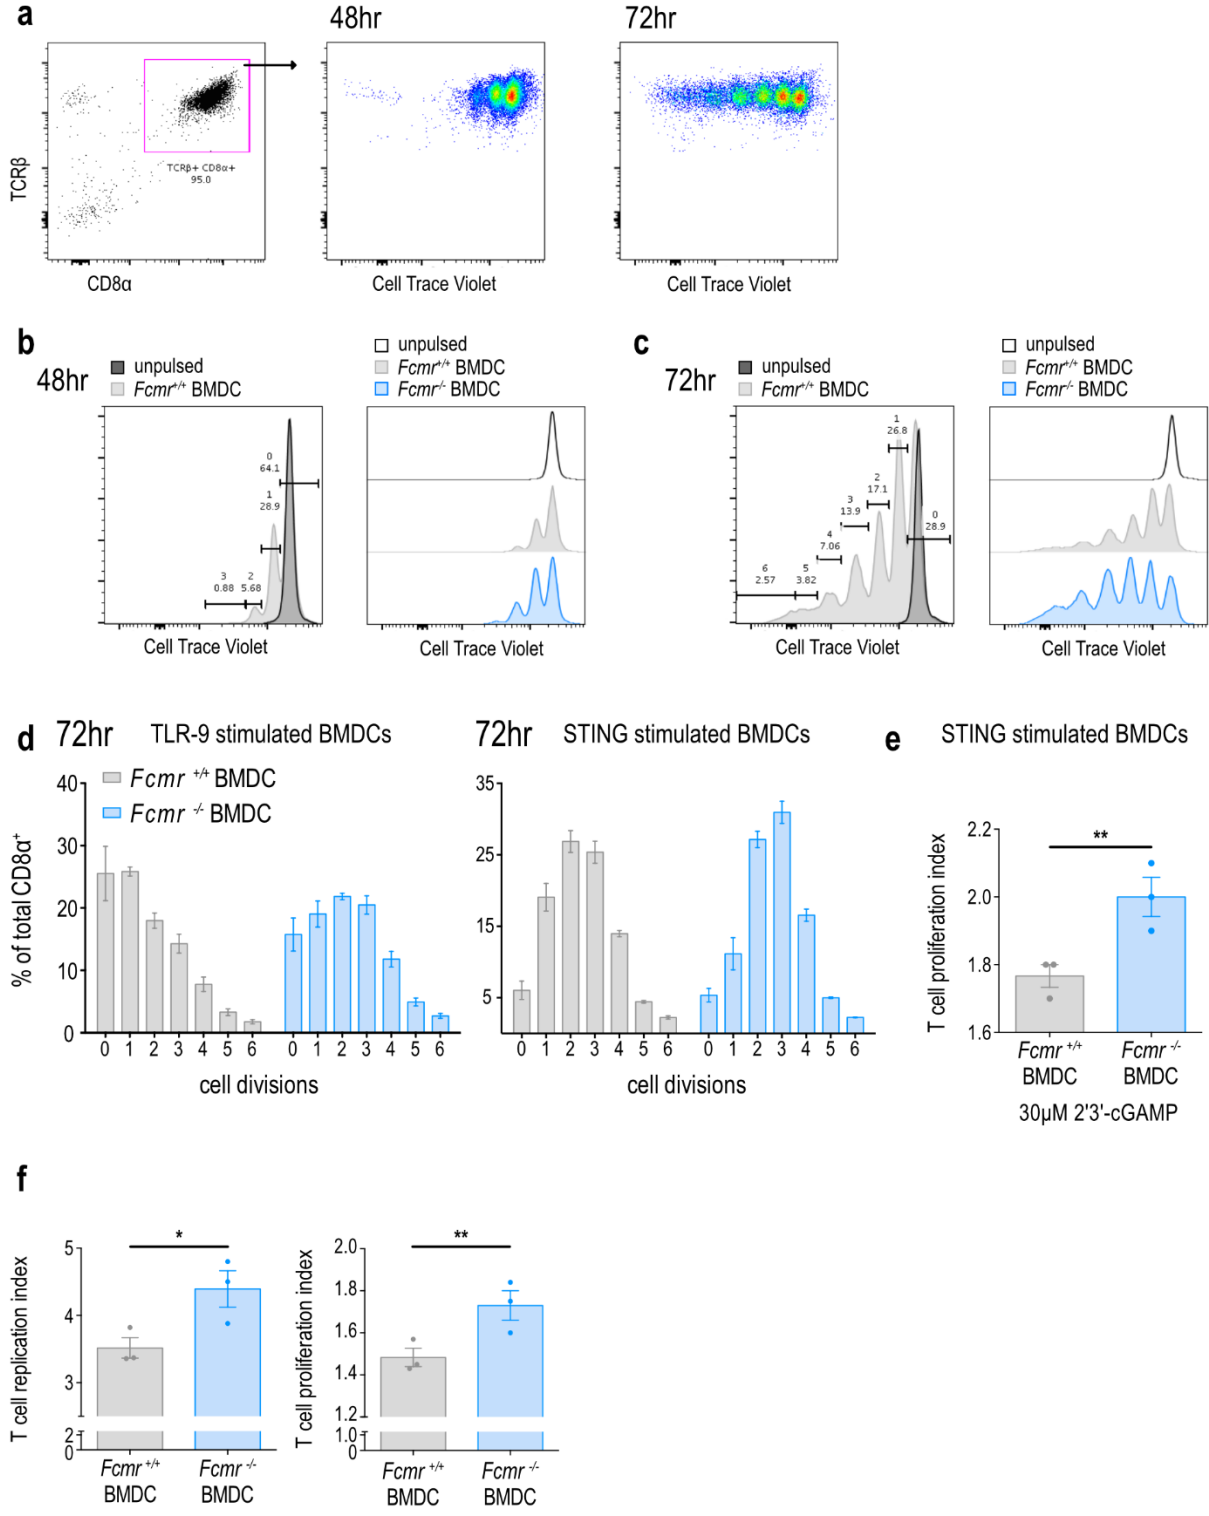

### Supplementary Figure 6. *Fcgr* inhibits BMDC-dependent T cell activation

**a** Representative flow cytometry plots illustrating the proliferation of Pmel TCR transgenic mouse CD8 $\alpha^+$  T cells after co-culture with BMDCs that had been stimulated and peptide-pulsed as described in Figure 6. Left: Cells were gated on TCR $\beta^+$  CD8 $\alpha^+$ . Right: Cell Trace Violet dot plots at 48 and 72 hrs after co-culture initiation.

**b, c** Left: Representative histogram illustrating the gating strategy to track the number of divisions of CVT-labelled T cells after co-culture with TLR9-activated BMDCs that were pulsed with peptide (or not). Right: Representative histograms comparing T cell divisions at **b** 48 hrs or **c** 72 hrs after co-culture with either activated unpulsed BMDCs, activated pulsed *Fcgr*<sup>+/+</sup> BMDCs, or activated pulsed *Fcgr*<sup>-/-</sup> BMDCs.

**d** Quantification of the percentage of CD8 $\alpha^+$  T cells that divided 0 to 6 times after 72 hrs of co-culture with *Fcgr*<sup>+/+</sup> or *Fcgr*<sup>-/-</sup> BMDCs that had been stimulated with the TLR-9 agonist CpG (left) and STING agonist 2'3'cGAMP (right). Data are from 3 technical replicates within each of 3 biological replicates.

**e** T cell proliferation index in the co-culture with *Fcgr*<sup>+/+</sup> or *Fcgr*<sup>-/-</sup> BMDCs that had been stimulated with STING agonist 2'3'cGAMP. Data are from 3 technical replicates within each of 3 biological replicates. Each data point represents a biological replicate.

**f** T cell replication index (left) and proliferation index (right) in the co-culture with *Fcgr*<sup>+/+</sup> or *Fcgr*<sup>-/-</sup> BMDCs that had been stimulated with TLR-9 agonist CpG. Data are from 3 technical replicates within each of 3 biological replicates. Each data point represents a biological replicate.

Data are represented as mean  $\pm$  SEM (ANOVA, *t* test; \**p*<0.05; \*\**p*<0.01; \*\*\**p*<0.001)

# Supplementary Figure 7

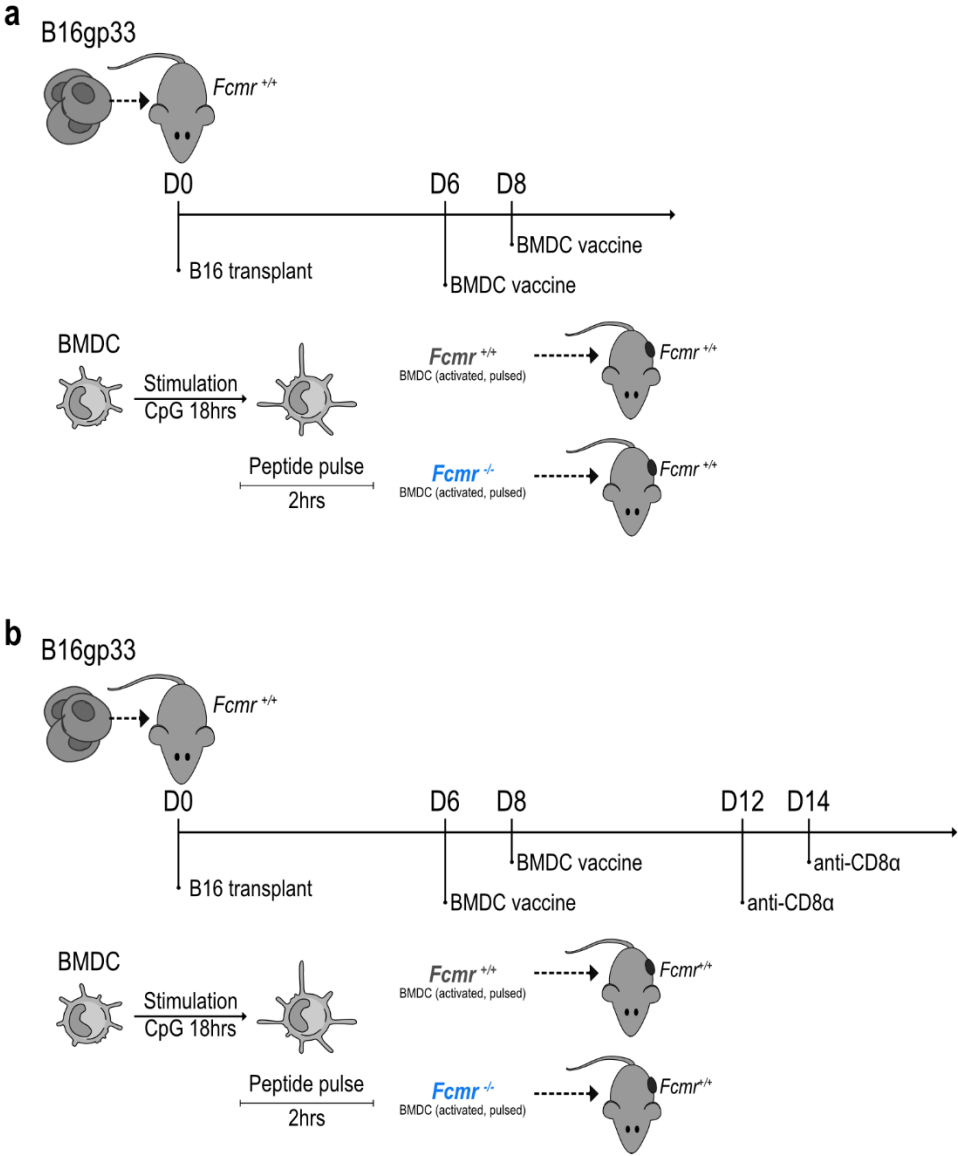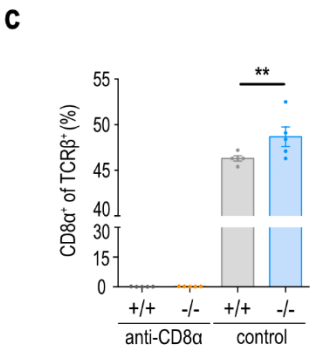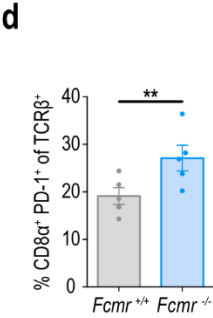

### Supplementary Figure 7. *Fcgr* inhibits DC-dependent T cell anti-tumor immunity

**a, b** Top: Schematic diagram of the experiment illustrating the ventral-lateral transplantation of B16gp33 cells (B16 cells ectopically expressing the LCMV peptide gp33) into *Fcgr*<sup>+/+</sup> recipient mice via intradermal injection superior to the inguinal LN. *Fcgr*<sup>+/+</sup> and *Fcgr*<sup>-/-</sup> BMDC vaccines were administered on days 6 and 8 post-transplant. Bottom: To make BMDC vaccines, *Fcgr*<sup>+/+</sup> and *Fcgr*<sup>-/-</sup> BMDCs were stimulated for 18 hrs with CpG, pulsed with gp33 peptide for 2 hrs, and transferred to B16gp33 tumor-bearing *Fcgr*<sup>+/+</sup> mice via intradermal injection contralateral to the tumor site.

**b** Schematic diagram representing experimental design as for **b** above, with the addition of anti-CD8 $\alpha$  antibody treatment on days 12 and 14 post-transplant.

**c** Quantification of the percent CD8 $\alpha$ <sup>+</sup> of TCR $\beta$ <sup>+</sup> T cells in the peripheral blood of DC vaccinated mice from **b**, with either anti-CD8 $\alpha$  monoclonal antibody treatment or control.

**d** Quantification of the percent CD8 $\alpha$ <sup>+</sup> PD-1<sup>+</sup> of TCR $\beta$ <sup>+</sup> T cells in the peripheral blood of *Fcgr*<sup>+/+</sup> and *Fcgr*<sup>-/-</sup> DC vaccinated control mice from **b**.

Data are represented as mean  $\pm$  SEM (*t* test; \**p*<0.05; \*\**p*<0.01; \*\*\**p*<0.001)

## Supplementary Figure 8

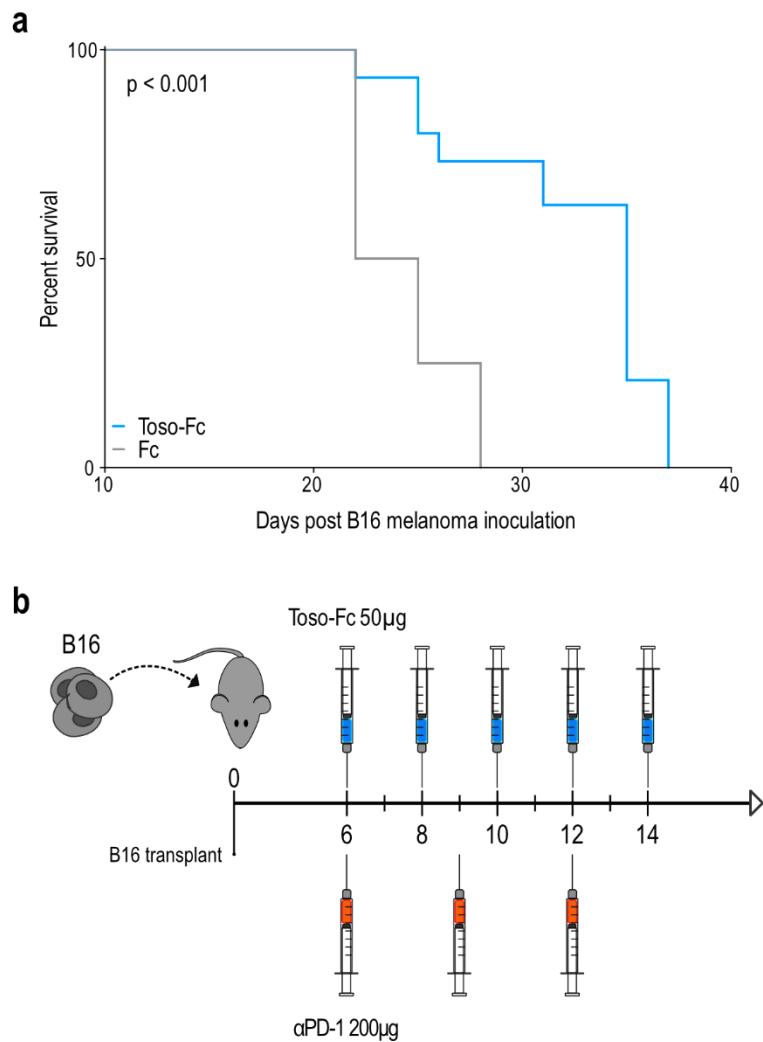

### Supplementary Figure 8. Toso-Fc increases survival and synergizes with anti-PD-1

**a** Survival curve for the mice in Figure 6a.

**b** Schematic diagram of the experiment showing the ventral-lateral transplantation of B16F0 cells superior to the inguinal LN via intradermal injection into *Fc $\mu$ r<sup>+/+</sup>* recipient mice (left), and the associated timeline of treatment with Toso-Fc fusion protein decoy receptor and anti-PD-1 antibody starting 6 days post-transplant (right).



## Supplementary Figure 9

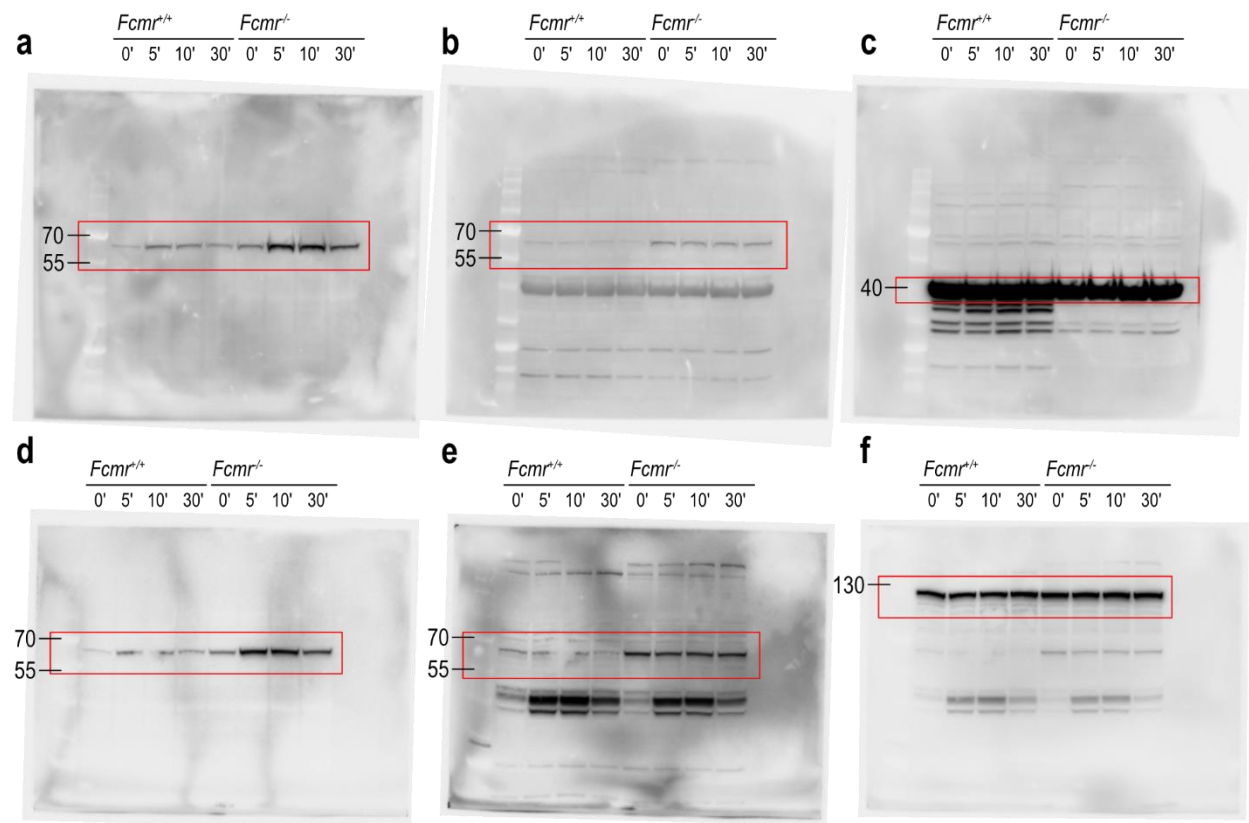

### Supplementary Figure 9. Total p65 and phospho-p65 in LPS stimulated BMDCs

Immunoblot analysis of total p65 and phospho-p65 protein levels in *Fcml*<sup>+/+</sup> and *Fcml*<sup>-/-</sup> BMDCs that were stimulated with 10  $\mu$ g/ml LPS (to engage TLR-4) for the indicated times. Two representative uncropped immunoblots are shown; one with  $\beta$ -actin loading control **c**, and one with vinculin loading control **f**. Data are representative of three separate biological replicates.

**a-c** Uncropped immunoblot from Figure 5c that was probed with anti-phospho-p65 **a**, stripped and re-probed for total p65 **b**, and  $\beta$ -actin **c**.

**d-f** Uncropped immunoblot with a different loading control, vinculin, representing an additional biological replicate. The blot was probed with anti-phospho-p65 **d**, stripped and re-probed for total p65 **e**, and vinculin **f**.
